# Supplementary material for: Design, Synthesis and DNA Interaction Study of New Potential DNA Bis-Intercalators Based on Glucuronic Acid
Source: Int J Mol Sci. 2013 Aug 15;14(8):16851–65. doi: 10.3390/ijms140816851 (PMC3759939; doi:10.3390/ijms140816851)
Supplement: Supplementary File 1 — Supporting Information (PDF, 269 KB) [file ijms-14-16851-s001.pdf]

# Supporting Information

$^1\text{H}$  and  $^{13}\text{C}$  NMR spectra of Compounds **3a–3d**.

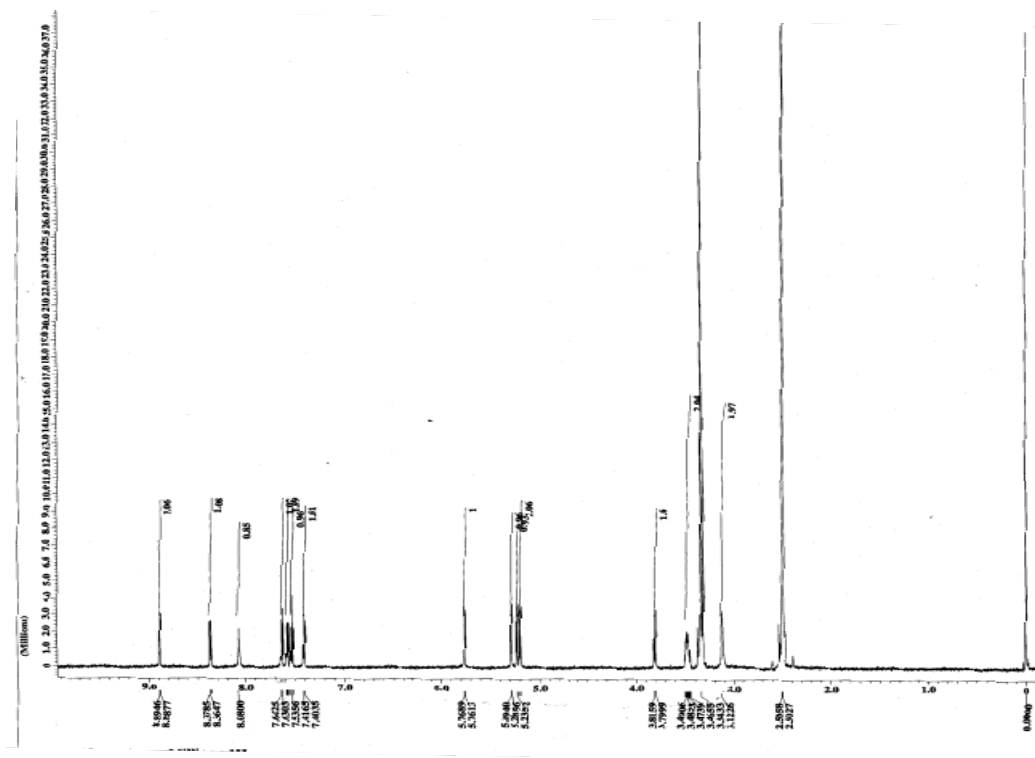

$^1\text{H}$  NMR of compound **3a**.

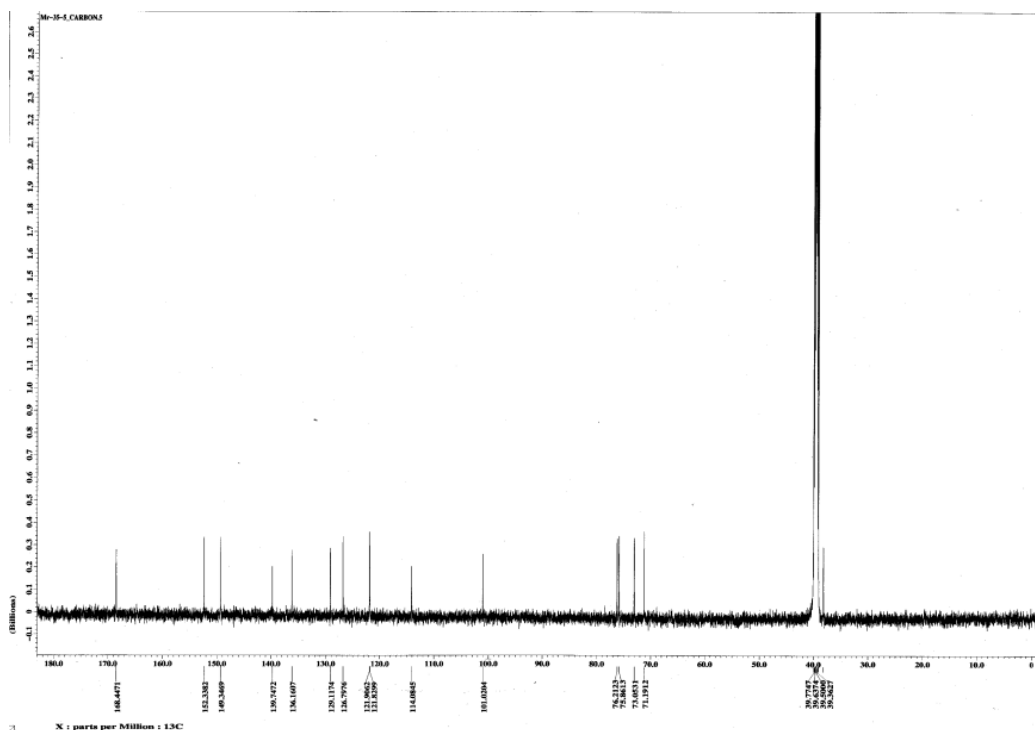

$^{13}\text{C}$  NMR of compound **3a**.

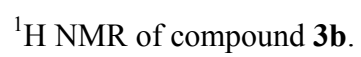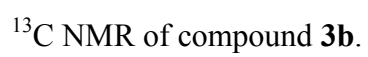

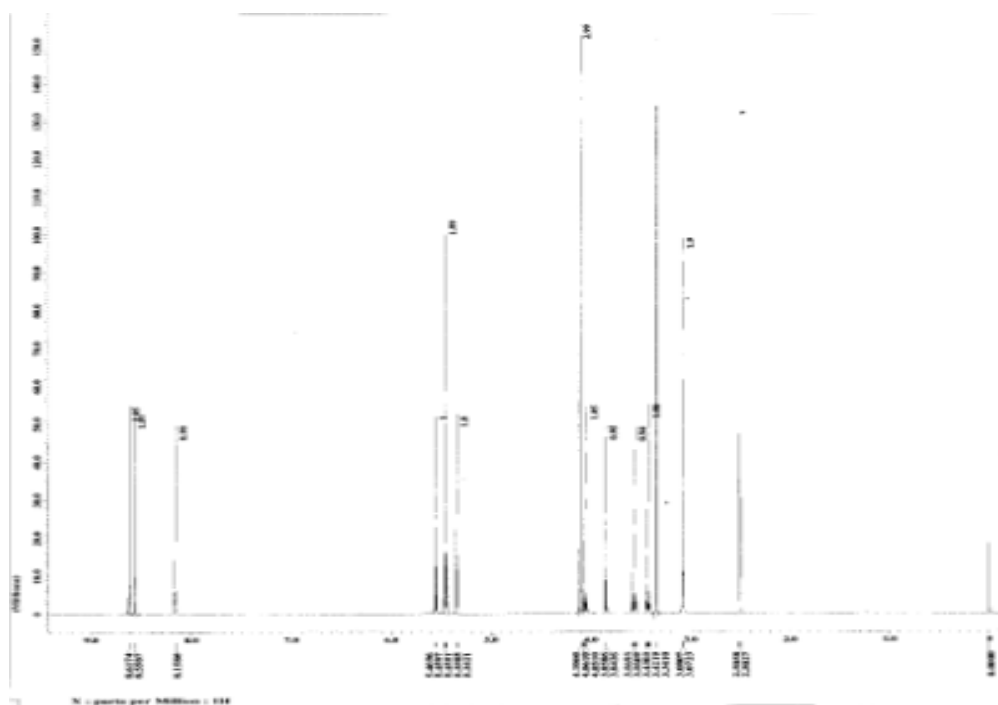 $^1\text{H}$  NMR of compound **3c**.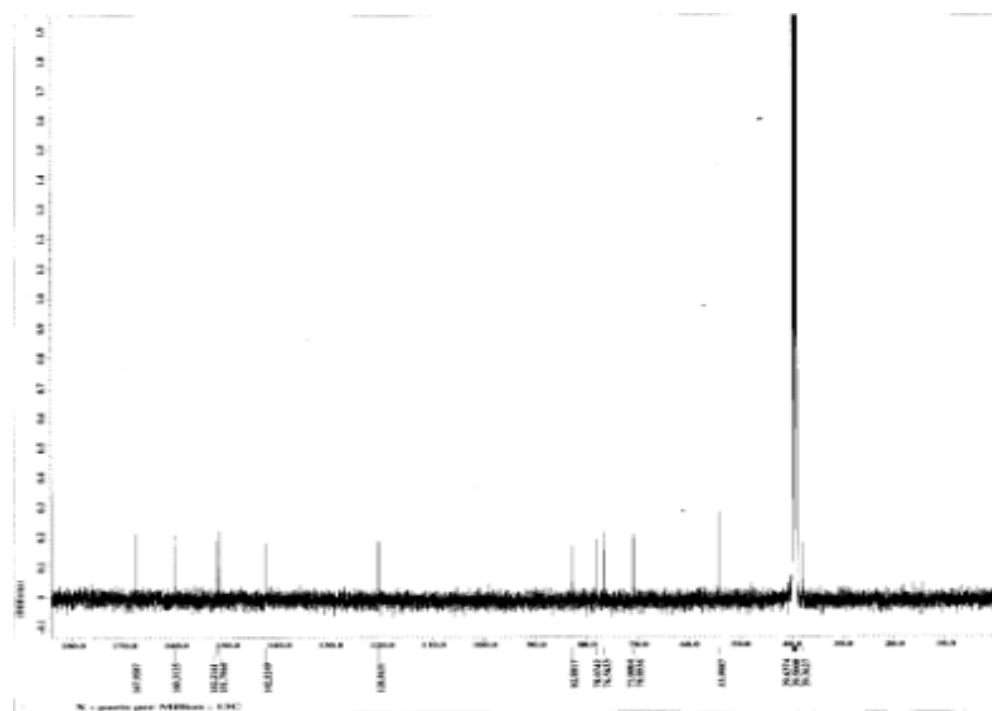 $^{13}\text{C}$  NMR of compound **3c**.

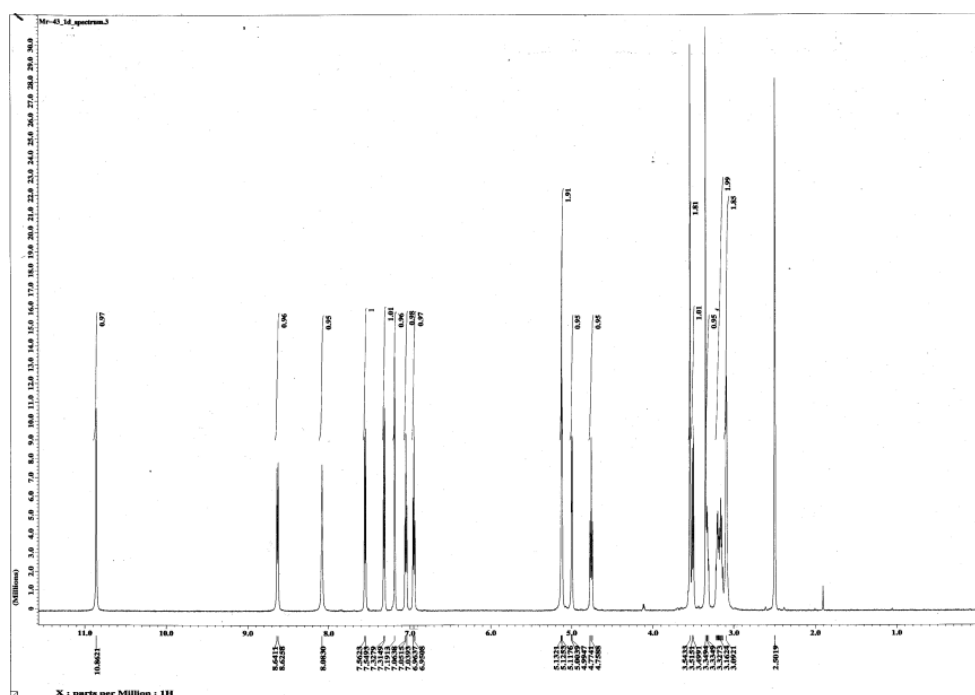<sup>1</sup>H NMR of compound **3d**.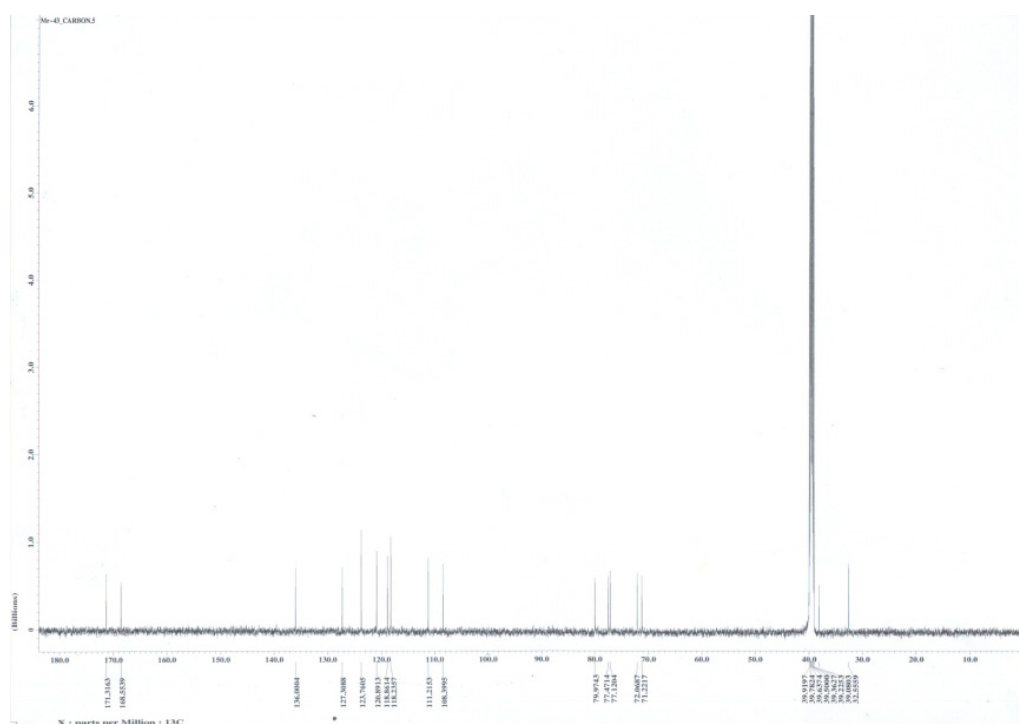 $^{13}\text{C}$  NMR of compound **3d**.

© 2013 by the authors; licensee MDPI, Basel, Switzerland. This article is an open access article distributed under the terms and conditions of the Creative Commons Attribution license (<http://creativecommons.org/licenses/by/3.0/>).
